# Supplementary material
Source: publisher figshare collection journal article supplement (https://gsapubs.figshare.com/ndownloader/files/23293814)
Supplement: Supplementary file 1 [file 23293814]

## Sheet: Sheet1
Table DR-2. U-Pb geochronologic analyses of Flattops I sandstone by Laser-Ablation Multicollector ICP Mass Spectrometry
				Isotopic ratios							Apparent ages (Ma)
Analysis	U	206Pb	U/Th	206Pb*	±	207Pb*	±	206Pb*	±	error	206Pb*	±	207Pb*	±	206Pb*	±	Best age	±	Conc
	(ppm)	204Pb		207Pb*	(%)	235U*	(%)	238U	(%)	corr.	238U*	(Ma)	235U	(Ma)	207Pb*	(Ma)	(Ma)	(Ma)	(%)
09070701-5	103.214	1515	0.907446	15.8538	31.3952	0.274836	31.5489	0.0316013	3.11001	0.0985773	200.562	6.14147	246.553	69.1679	710.83	683.33	200.562	6.14147	28.2152
09070701-63	83.65	1278	0.579244	17.869	5.43413	0.253069	5.5716	0.0327973	1.23	0.220763	208.032	2.51795	229.066	11.4259	450.87	120.753	208.032	2.51795	46.1401
09070701-47	30.2612	1380	0.697938	21.0241	17.8582	0.216508	18.007	0.0330133	2.31	0.128284	209.38	4.75898	198.999	32.552	77.6395	427.11	209.38	4.75898	269.682
09070701-21	77.3715	3126	1.80656	19.6921	5.25965	0.235617	5.28938	0.033651	0.560001	0.105873	213.358	1.17525	214.825	10.2417	230.914	121.544	213.358	1.17525	92.3972
09070701-22	56.677	2343	1.14466	20.8654	13.5042	0.222909	13.5135	0.0337328	0.500002	0.0370003	213.868	1.0518	204.328	25.016	95.624	320.926	213.868	1.0518	223.656
09070701-72	190.643	6285	0.820079	19.8028	2.72491	0.234942	2.85145	0.0337432	0.84	0.294587	213.933	1.76755	214.27	5.50825	217.997	63.082	213.933	1.76755	98.136
09070701-100	138.026	5418	0.748626	20.1935	5.24267	0.231092	5.27041	0.033845	0.54	0.102459	214.568	1.1396	211.1	10.0458	172.55	122.436	214.568	1.1396	124.351
09070701-24	83.4624	2976	1.5115	20.3939	8.19738	0.229544	8.24134	0.033952	0.850001	0.103139	215.235	1.7993	209.822	15.6237	149.45	192.412	215.235	1.7993	144.019
09070701-1	108.361	3588	1.13515	19.9239	5.66991	0.235165	5.7037	0.0339816	0.62	0.108701	215.42	1.31353	214.453	11.0268	203.83	131.657	215.42	1.31353	105.686
09070701-65	248.611	7152	0.803735	19.7381	3.28397	0.23805	3.32182	0.0340779	0.5	0.15052	216.02	1.0622	216.823	6.48548	225.528	75.9406	216.02	1.0622	95.784
09070701-15	124.184	3570	0.910221	19.2712	21.0088	0.243819	21.0218	0.034078	0.74	0.0352015	216.021	1.57207	221.543	41.8655	280.628	485.498	216.021	1.57207	76.9777
09070701-97	313.398	5622	2.02811	18.8833	2.61103	0.249284	2.84905	0.0341407	1.14	0.400134	216.411	2.42614	225.994	5.77254	326.92	59.272	216.411	2.42614	66.197
09070701-34	321.111	5736	0.903666	19.4184	3.16461	0.242975	3.22099	0.0342194	0.600002	0.186279	216.902	1.27977	220.854	6.39329	263.179	72.663	216.902	1.27977	82.4162
09070701-46	123.544	4500	0.618042	19.7546	3.24626	0.238855	3.32514	0.0342216	0.72	0.216532	216.916	1.53581	217.482	6.50968	223.61	75.0747	216.916	1.53581	97.0061
09070701-91	104.394	3450	2.33553	21.1364	10.8407	0.224404	10.8522	0.0344002	0.5	0.0460734	218.029	1.07192	205.569	20.1982	65.0085	258.757	218.029	1.07192	335.385
09070701-32	179.393	3789	0.933234	16.9522	18.3472	0.279798	18.4422	0.0344009	1.87	0.101398	218.033	4.00904	250.498	40.9621	566.728	402.554	218.033	4.00904	38.4723
09070701-31	238.691	4800	1.1628	19.4948	2.84287	0.243467	2.95602	0.0344237	0.81	0.274018	218.175	1.73765	221.255	5.87688	254.132	65.4064	218.175	1.73765	85.8513
09070701-38	106.904	3168	0.483258	19.2355	3.30571	0.248479	3.34331	0.034665	0.500001	0.149553	219.679	1.07989	225.34	6.75648	284.845	75.6146	219.679	1.07989	77.1221
09070701-28	342.075	4986	0.494453	18.7317	4.10319	0.25542	4.13354	0.0347002	0.5	0.120962	219.899	1.08095	230.97	8.53943	345.186	92.8437	219.899	1.08095	63.7044
09070701-83	264.958	8799	0.68446	19.4773	1.87853	0.245845	1.9782	0.0347287	0.62	0.313417	220.076	1.34144	223.196	3.96369	256.189	43.184	220.076	1.34144	85.9038
09070701-92	167.405	5394	0.690846	19.4991	3.18284	0.246127	3.23706	0.0348075	0.59	0.182264	220.567	1.27933	223.425	6.49207	253.652	73.2336	220.567	1.27933	86.9562
09070701-3	557.722	17160	1.37382	19.9395	2.43269	0.241621	2.48354	0.0349421	0.5	0.201326	221.405	1.08823	219.747	4.90738	202.008	56.4679	221.405	1.08823	109.602
09070701-93	193.666	3564	1.95106	16.317	16.8682	0.295525	16.9041	0.0349731	1.10001	0.0650736	221.598	2.39617	262.899	39.1728	649.257	364.602	221.598	2.39617	34.131
09070701-35	707.565	21432	1.57088	19.4423	0.571507	0.248227	0.765977	0.0350022	0.51	0.665816	221.779	1.11184	225.135	1.54668	260.362	13.1209	221.779	1.11184	85.1813
09070701-41	228.953	9174	1.34479	19.5667	2.14632	0.247851	2.84012	0.0351727	1.86	0.654901	222.841	4.07403	224.829	5.72795	245.664	49.4125	222.841	4.07403	90.7096
09070701-60	244.241	6456	0.554837	19.3248	1.68045	0.251223	1.75326	0.0352106	0.5	0.285184	223.077	1.09631	227.569	3.57438	274.222	38.5062	223.077	1.09631	81.3492
09070701-53	312.349	7536	0.458048	19.57	1.8431	0.248202	2.00136	0.0352285	0.78	0.389736	223.189	1.71108	225.114	4.04088	245.257	42.4405	223.189	1.71108	91.002
09070701-95	156.382	5586	0.983532	19.3333	1.70097	0.251945	1.92909	0.0353273	0.91	0.471725	223.804	2.00167	228.155	3.9419	273.218	38.982	223.804	2.00167	81.9141
09070701-8	287.953	8757	1.18065	19.3693	1.22433	0.252305	1.56824	0.0354436	0.98	0.624904	224.528	2.1625	228.446	3.20818	268.948	28.0744	224.528	2.1625	83.484
09070701-40	63.9816	2469	1.0962	19.4381	6.34619	0.251657	6.61597	0.0354782	1.87	0.28265	224.744	4.13029	227.921	13.5074	260.821	145.874	224.744	4.13029	86.1678
09070701-11	377.12	11385	0.669711	19.6934	2.51467	0.248792	2.56787	0.035535	0.52	0.202503	225.097	1.15031	225.595	5.19461	230.762	58.0874	225.097	1.15031	97.5451
09070701-30	179.769	6036	1.02402	19.7822	2.9902	0.247801	3.20732	0.0355529	1.16	0.361672	225.209	2.56732	224.788	6.46749	220.406	69.1892	225.209	2.56732	102.179
09070701-14	158.142	5247	1.38317	19.6108	2.61593	0.249983	2.797	0.0355553	0.99	0.353951	225.224	2.19121	226.562	5.67979	240.477	60.3337	225.224	2.19121	93.6571
09070701-39	151.069	5019	0.606804	19.4545	3.06359	0.25205	3.10413	0.0355636	0.5	0.161076	225.275	1.10692	228.24	6.34512	258.898	70.4021	225.275	1.10692	87.013
09070701-7	517.138	15510	0.859287	19.7179	1.28226	0.248913	1.3763	0.0355965	0.5	0.363293	225.48	1.10791	225.693	2.78522	227.919	29.6389	225.48	1.10791	98.9298
09070701-79	391.255	3477	1.35978	16.9993	3.3239	0.288728	3.50119	0.0355975	1.1	0.314179	225.486	2.43747	257.558	7.96493	560.676	72.4715	225.486	2.43747	40.2169
09070701-9	366.009	10494	0.71985	19.763	1.82033	0.249606	1.88775	0.0357772	0.5	0.264866	226.605	1.11334	226.256	3.82876	222.617	42.1059	226.605	1.11334	101.791
09070701-43	143.825	6207	0.720061	19.8902	4.11538	0.248781	4.27036	0.0358884	1.14	0.266957	227.297	2.54604	225.585	8.63843	207.778	95.4605	227.297	2.54604	109.394
09070701-33	105.746	783	0.378692	12.3049	8.41524	0.402276	8.50905	0.0359007	1.26001	0.148079	227.373	2.81499	343.298	24.7906	1227.92	165.494	227.373	2.81499	18.5169
09070701-86	142.297	4500	0.744839	19.7556	6.80621	0.250835	6.82455	0.0359399	0.500005	0.0732656	227.617	1.11824	227.254	13.8969	223.481	157.529	227.617	1.11824	101.851
09070701-25	177.269	6408	1.12282	19.7766	2.60579	0.250974	2.65333	0.035998	0.5	0.188443	227.979	1.11997	227.367	5.40512	221.031	60.2895	227.979	1.11997	103.144
09070701-58	307.632	11916	0.92849	19.7322	1.9649	0.251943	2.02752	0.0360559	0.5	0.246607	228.339	1.12171	228.153	4.143	226.236	45.4158	228.339	1.12171	100.93
09070701-16	94.3807	3588	0.480199	19.8966	4.92788	0.250351	5.00065	0.0361266	0.850002	0.169978	228.779	1.91052	226.861	10.1669	207.005	114.365	228.779	1.91052	110.519
09070701-2	104.648	3417	0.514094	20.0311	10.0903	0.248905	10.1174	0.0361608	0.740001	0.0731413	228.992	1.6648	225.686	20.4768	191.398	235.185	228.992	1.6648	119.641
09070701-10	135.853	4155	0.705755	19.8996	6.1239	0.251156	6.14679	0.0362482	0.53	0.0862239	229.535	1.19513	227.514	12.5295	206.663	142.169	229.535	1.19513	111.067
09070701-13	366.98	15237	1.07035	19.626	1.08556	0.255005	1.3485	0.0362978	0.8	0.593253	229.844	1.80636	230.634	2.78218	238.69	25.0107	229.844	1.80636	96.2939
09070701-80	362.77	13803	1.44683	19.7039	1.44407	0.256101	1.7396	0.0365985	0.97	0.557598	231.715	2.20772	231.52	3.60138	229.526	33.3535	231.715	2.20772	100.953
09070701-74	88.2291	2478	0.467357	20.4023	10.7314	0.24736	11.2099	0.0366023	3.24	0.289031	231.738	7.37496	224.43	22.5757	148.497	252.177	231.738	7.37496	156.056
09070701-44	183.824	6759	0.852592	19.7594	3.58981	0.256043	3.64296	0.0366932	0.620001	0.170191	232.303	1.41464	231.473	7.5405	223.036	83.0341	232.303	1.41464	104.155
09070701-68	170.064	4623	0.721162	19.3778	3.38735	0.263154	3.50488	0.036984	0.9	0.256785	234.111	2.0692	237.206	7.4142	267.943	77.6954	234.111	2.0692	87.3737
09070701-48	194.223	5778	0.503497	19.8233	3.67432	0.257405	3.76911	0.0370077	0.84	0.222864	234.259	1.93245	232.574	7.83465	215.58	85.1106	234.259	1.93245	108.664
09070701-70	199.74	6159	0.772702	19.5805	2.91231	0.261401	2.95492	0.0371218	0.5	0.16921	234.968	1.15369	235.795	6.21777	244.031	67.1103	234.968	1.15369	96.2863
09070701-90	115.77	4485	1.09078	19.9419	5.31959	0.260465	5.34304	0.0376717	0.500001	0.09358	238.385	1.17016	235.041	11.2113	201.761	123.579	238.385	1.17016	118.152
09070701-37	80.6597	2346	1.26507	15.8597	24.9573	0.36453	24.9743	0.0419303	0.920017	0.0368386	264.787	2.38673	315.591	67.8451	710.031	538.411	264.787	2.38673	37.2923
09070701-45	209.699	21510	2.02179	16.3878	1.53077	0.870296	2.0948	0.10344	1.43	0.682644	634.536	8.64159	635.728	9.89788	639.989	32.9369	634.536	8.64159	99.148
09070701-42	207.884	35742	2.31652	13.2967	2.1702	1.94697	2.2803	0.187759	0.7	0.306977	1109.22	7.13328	1097.4	15.2981	1074.05	43.607	1074.05	43.607	103.275
09070701-55	160.575	34773	2.46897	13.2864	1.27152	1.89601	1.50225	0.182704	0.8	0.532533	1081.73	7.96674	1079.69	9.98684	1075.6	25.5112	1075.6	25.5112	100.57
09070701-36	167.521	34785	2.90506	13.2539	0.870794	1.88912	1.326	0.181594	1	0.754147	1075.68	9.90721	1077.27	8.80398	1080.53	17.4523	1080.53	17.4523	99.5511
09070701-59	176.353	23862	1.83812	13.2295	0.85375	1.80427	0.989388	0.173118	0.500001	0.505363	1029.27	4.75652	1047.01	6.46375	1084.22	17.1012	1084.22	17.1012	94.9316
09070701-62	263.761	23769	3.41757	13.2278	0.790599	1.75828	3.21861	0.168685	3.12	0.969363	1004.86	29.0304	1030.22	20.8357	1084.47	15.8354	1084.47	15.8354	92.659
09070701-57	443.402	71277	3.03696	13.1923	1.00043	1.94968	1.17697	0.186544	0.62	0.526775	1102.62	6.28357	1098.33	7.89938	1089.84	20.0257	1089.84	20.0257	101.173
09070701-82	169.038	32493	2.34662	13.0947	1.40197	1.98165	1.48846	0.188201	0.500001	0.335917	1111.62	5.10529	1109.28	10.045	1104.71	28.0236	1104.71	28.0236	100.625
09070701-77	338.743	34722	2.63838	13.0555	0.880397	1.85278	2.33253	0.175436	2.16	0.926033	1041.99	20.7822	1064.42	15.3832	1110.67	17.6038	1110.67	17.6038	93.8166
09070701-19	227.784	43806	2.91434	13.0321	0.830673	1.96872	1.11248	0.186079	0.74	0.665179	1100.1	7.484	1104.87	7.4911	1114.25	16.5635	1114.25	16.5635	98.7296
09070701-76	133.111	27201	2.32025	13.0232	0.893472	2.00127	1.8413	0.189027	1.61	0.874381	1116.1	16.4997	1115.94	12.4674	1115.61	17.8285	1115.61	17.8285	100.044
09070701-94	172.238	38229	3.52516	13.022	0.9227	2.00463	1.04946	0.189327	0.500001	0.476434	1117.73	5.13098	1117.08	7.10965	1115.84	18.402	1115.84	18.402	100.17
09070701-87	148.553	31230	2.79357	13.001	1.22312	2.01403	1.32137	0.189907	0.500001	0.378397	1120.87	5.14419	1120.25	8.96568	1119.06	24.3908	1119.06	24.3908	100.162
09070701-6	111.131	17934	1.10328	12.9913	2.15074	2.02899	2.20809	0.191175	0.5	0.22644	1127.74	5.17302	1125.28	15.0197	1120.55	42.8928	1120.55	42.8928	100.641
09070701-81	184.044	32970	2.63239	12.9761	1.11049	2.02169	1.40456	0.190264	0.86	0.612292	1122.81	8.86197	1122.83	9.54217	1122.89	22.1593	1122.89	22.1593	99.9923
09070701-56	520.388	89259	3.31117	12.9546	1.06009	2.03609	1.17208	0.191302	0.5	0.42659	1128.42	5.17589	1127.65	7.98141	1126.19	21.1451	1126.19	21.1451	100.199
09070701-51	360.188	61035	2.70873	12.9465	0.950319	2.02751	1.22311	0.190377	0.77	0.629541	1123.42	7.93851	1124.78	8.31733	1127.4	18.9424	1127.4	18.9424	99.6469
09070701-52	214.173	37932	1.93251	12.8588	1.26002	2.05403	1.38295	0.191561	0.57	0.412162	1129.82	5.90723	1133.64	9.44459	1140.94	25.0374	1140.94	25.0374	99.0257
09070701-54	372.717	7140	2.79281	12.8383	3.31635	1.88107	3.35383	0.17515	0.500017	0.149088	1040.42	4.80419	1074.44	22.2378	1144.1	65.9283	1144.1	65.9283	90.9383
09070701-18	26.7137	6009	1.0633	12.8142	3.06802	2.13157	3.17314	0.198102	0.810008	0.25527	1165.11	8.6338	1159.09	21.9343	1147.87	60.9705	1147.87	60.9705	101.502
09070701-20	24.1758	5712	1.52678	12.7442	2.96409	2.1144	3.08914	0.195434	0.87001	0.281635	1150.74	9.16889	1153.51	21.2982	1158.7	58.7852	1158.7	58.7852	99.3133
09070701-50	35.5962	9468	1.22138	12.6477	2.2009	2.20441	2.30063	0.20221	0.670005	0.291227	1187.18	7.2647	1182.44	16.0715	1173.8	43.5504	1173.8	43.5504	101.14
09070701-78	35.359	7929	1.22702	12.62	2.2162	2.22545	2.32113	0.203693	0.690003	0.29727	1195.13	7.52713	1189.09	16.2627	1178.14	43.8331	1178.14	43.8331	101.442
09070701-75	46.0511	10491	1.40772	12.6094	1.02709	2.14919	1.54189	0.196547	1.15	0.745839	1156.74	12.1774	1164.79	10.685	1179.81	20.3068	1179.81	20.3068	98.0451
09070701-99	43.0939	8520	1.15163	12.5652	1.26845	2.17417	1.4032	0.198135	0.600002	0.427595	1165.29	6.39626	1172.82	9.75949	1186.75	25.0742	1186.75	25.0742	98.1923
09070701-96	24.9758	3372	0.869998	12.5247	3.49701	2.21835	3.53696	0.20151	0.530084	0.14987	1183.42	5.73101	1186.85	24.7596	1193.11	69.0148	1193.11	69.0148	99.1881
09070701-64	73.5978	16962	1.12009	12.4419	0.921096	2.27118	1.62604	0.204945	1.34	0.824086	1201.83	14.6924	1203.38	11.4638	1206.15	18.123	1206.15	18.123	99.6416
09070701-89	24.6889	6111	1.24636	12.3584	2.52356	2.30328	2.58495	0.206448	0.560002	0.21664	1209.86	6.17746	1213.3	18.3033	1219.42	49.635	1219.42	49.635	99.2161
09070701-67	365.28	44019	5.41411	11.334	1.26013	2.58226	1.747	0.212267	1.21	0.692614	1240.88	13.658	1295.62	12.7876	1387.48	24.1932	1387.48	24.1932	89.4342
09070701-69	619.127	46884	1.76824	11.1567	0.940621	2.59719	1.3656	0.210153	0.99	0.724955	1229.63	11.0828	1299.84	10.0117	1417.7	17.9835	1417.7	17.9835	86.7346
09070701-12	142.247	28158	0.69181	10.937	0.800142	3.20477	0.943518	0.254211	0.5	0.529931	1460.16	6.533	1458.31	7.30201	1455.61	15.2194	1455.61	15.2194	100.312
09070701-27	410.432	39471	3.43482	10.9148	1.07106	3.06951	2.08597	0.242987	1.79	0.858114	1402.21	22.5574	1425.11	15.9772	1459.48	20.3622	1459.48	20.3622	96.0761
09070701-85	299.98	44538	3.5421	10.8668	0.532582	3.21591	0.730509	0.253456	0.500001	0.684455	1456.28	6.51753	1461	5.65813	1467.85	10.1134	1467.85	10.1134	99.2112
09070701-61	141.337	18186	1.36555	10.732	0.866741	3.20969	1.21398	0.249828	0.850002	0.700179	1437.59	10.9529	1459.5	9.39867	1491.52	16.407	1491.52	16.407	96.3842
09070701-66	292.565	62892	1.40111	10.5086	0.890496	3.54715	1.40751	0.270347	1.09	0.774417	1542.56	14.9536	1537.8	11.1491	1531.23	16.7664	1531.23	16.7664	100.74
09070701-71	137.596	4116	1.44353	10.4996	1.37015	3.07139	1.50805	0.233886	0.630017	0.417769	1354.83	7.6984	1425.58	11.552	1532.85	25.7933	1532.85	25.7933	88.3867
09070701-23	174.847	57939	3.46581	9.75663	0.580195	4.20324	0.792608	0.297428	0.54	0.681296	1678.54	7.98015	1674.65	6.50136	1669.76	10.7285	1669.76	10.7285	100.526
09070701-26	101.134	30894	0.720289	9.65242	0.660243	4.24341	1.40482	0.297064	1.24	0.882675	1676.73	18.3075	1682.46	11.5444	1689.6	12.1799	1689.6	12.1799	99.2387
09070701-49	50.9833	17424	0.946	9.55779	0.931843	4.34006	1.47239	0.300851	1.14	0.774252	1695.53	16.9961	1701.01	12.1513	1707.75	17.1493	1707.75	17.1493	99.2846
09070701-4	267.176	10101	1.47784	9.48603	1.24833	4.20086	2.5731	0.289016	2.25001	0.874434	1636.61	32.5214	1674.19	21.1063	1721.6	22.9329	1721.6	22.9329	95.0631
09070701-88	49.8689	18279	1.04397	8.58928	1.02034	5.46845	1.13626	0.340659	0.500001	0.440039	1889.84	8.19013	1895.66	9.75408	1902.01	18.3359	1902.01	18.3359	99.3599
09070701-29	986.382	260385	10.2377	5.03943	0.710001	13.3475	0.916789	0.487843	0.58	0.632643	2561.34	12.2594	2704.55	8.66031	2813.36	11.6031	2813.36	11.6031	91.042
1. All uncertainties are reported at the 1-sigma level, and include only measurement errors. Systematic errors increase the uncertainty of age clusters by 1-2%.
2. U concentration and U/Th are calibrated relative to LaserChron lab Sri Lanka zircon and are accurate to ~20%.
3. Common Pb correction is from 204Pb, with composition interpreted from Stacey and Kramers (1975) and uncertainties of 1.5 for 206Pb/204Pb, 0.3 for 207Pb/204Pb, and 2.0 for 208Pb/204Pb.
4. U/Pb and 206Pb/207Pb fractionation is calibrated relative to fragments of a large Sri Lanka zircon of 563.5 ± 3.2 Ma (2-sigma).
5. U decay constants and composition as follows: 238U = 9.8485 x 10-10, 235U = 1.55125 x 10-10, 238U/235U = 137.88
6. Reporting concordancy of <600 Ma zircons is not recommended by LaserChron lab due to imprecision of 207Pb measurement
For each analysis, the errors in determining 206Pb/238U and 206Pb/204Pb result in a measurement error of ~1-2% (at 2-sigma level) in the 206Pb/238U age. 204Hg interference with 204Pb is accounted for measurement of 202Hg during laser ablation and subtraction of 204Hg according to the natural 202Hg/204Hg of 4.35. This Hg is correction is not significant for most analyses because our Hg backgrounds…
